# Supplementary material
Source: PubMed Central journal article supplement (PMC7899739)
Supplement: 40258_2021_644_MOESM1_ESM.pdf [file 40258_2021_644_MOESM1_ESM.pdf]

## Supplementary Material 1

# Willingness to Pay for a COVID-19 Vaccine

## *Applied Health Economics and Health Policy*

*Arcadio A. Cerda & Leidy Y. García*

Faculty of Economics and Business, University of Talca, Chile

e-mail address of the corresponding author: [lgarcia@utalca.cl](mailto:lgarcia@utalca.cl)

### SURVEY COVID-19 STUDY

#### Informed consent

Please read this information carefully before participating in the study:

Hello, we are conducting a "SECOND study on COVID-19" to determine the SOCIAL VALUATION OF A VACCINE against this disease in Chile.

Your participation involves answering some questions about your family context and the chance of acquiring a vaccine. It will take approximately 10 minutes. Please note that your participation is voluntary, and you can withdraw at any time. No anticipated risks are associated with participating in this study, beyond those associated with viewing a computer screen for 10 minutes and answering a questionnaire about the information you will see on the screen.

If you are responding from a CELL PHONE, then we recommend placing the phone HORIZONTALLY so that you can see all the options.

Your participation will contribute to the general knowledge about the social value of a COVID-19 vaccine.

You do not need to state your name anywhere in the questionnaire. The information that you provide will be anonymous and confidential. Your answers will not be disclosed in any way, because they will be analyzed in a cluster, not individually. Your data will be stored in a digital file. Only the researcher and their research assistant, who have signed a guarantee of confidentiality, can access them through a password.

Your participation is voluntary. You may withdraw from the study whenever you deem it appropriate. To do so, just close or leave the questionnaire web page. Please note that this study complements a previous one in which you may have also participated.

If you have any questions or concerns regarding your rights as a participant in this study or any concerns before, during, or after your participation, you may contact Dr. Arcadio Cerda, academic at the University of Talca at the following email: [acerda@utalca.cl](mailto:acerda@utalca.cl).

- I. Are you willing to complete this survey under the cited conditions? \*

1.1 Mark only one oval.

1.2 Yes 1.3  1.4 No 1.5

1.6

Section A

- I. In this question, you will find some statements related to COVID-19. Keep in mind that there is no right or wrong answer. We are only interested in your opinion or information about your particular context. \*

Mark only one oval per row.

|                                                                                                       | Yes                   | No                    |
|-------------------------------------------------------------------------------------------------------|-----------------------|-----------------------|
| I have answered a similar survey before.                                                              | <input type="radio"/> | <input type="radio"/> |
| My fears of contagion have increased since April.                                                     | <input type="radio"/> | <input type="radio"/> |
| I am informed of the implications of the COVID-19 pandemic.                                           | <input type="radio"/> | <input type="radio"/> |
| I am not going to get sick; I am strong.                                                              | <input type="radio"/> | <input type="radio"/> |
| I have chronic diseases (hypertension, diabetes, cancer, autoimmune disease, and COPD, among others). | <input type="radio"/> | <input type="radio"/> |
| A (some) close relative(s) has (have) chronic diseases.                                               | <input type="radio"/> | <input type="radio"/> |
| I live with an elder(s).                                                                              | <input type="radio"/> | <input type="radio"/> |
| There are COVID-19 patients in my family.                                                             | <input type="radio"/> | <input type="radio"/> |
| There are RECOVERED COVID-19 patients in my family.                                                   | <input type="radio"/> | <input type="radio"/> |

2. Based on your opinion, please indicate your level of agreement with the following statements: \*

Mark only one oval per row.

|                                                                        | Strongly agree        | Disagree              | Indifferent           | Agree                 | Strongly agree        |
|------------------------------------------------------------------------|-----------------------|-----------------------|-----------------------|-----------------------|-----------------------|
| The pandemic will continue to reduce sources of employment.            | <input type="radio"/> |
| The pandemic will continue to reduce the country's economic activity.  | <input type="radio"/> |
| The state must continue to borrow money to support those most in need. | <input type="radio"/> |
| I am willing to pay more taxes next year to pay off debt.              | <input type="radio"/> |
| The government has adequately managed during this pandemic.            | <input type="radio"/> |

|                                                                                                |                       |                       |                       |                       |                       |
|------------------------------------------------------------------------------------------------|-----------------------|-----------------------|-----------------------|-----------------------|-----------------------|
| My perception of the government's actions "concerning April" has worsened.                     | <input type="radio"/> |
| I am someone who loves risk.                                                                   | <input type="radio"/> |
| For me, I would keep working in my usual workplace (not telework), regardless of my resources. | <input type="radio"/> |
| Teleworking is impossible with children around.                                                | <input type="radio"/> |
| I have adapted to working at home.                                                             | <input type="radio"/> |
| My level of health knowledge on the virus is good.                                             | <input type="radio"/> |
| Socioeconomic impact is more important than taking care of yourself.                           | <input type="radio"/> |

3. The most difficult part of the pandemic has been (check the most relevant)\*

1.7 Mark only one oval.

- Being away from my usual environments (family, friends, colleagues)
  - Making my work and family life fit at home
  - Reduced income
  - Loss of employment; domestic violence
  - Getting sick from COVID-19
  - Death of family or friends due to COVID-19
  - Illness of family or friends due to COVID-19
- Other: \_\_\_\_\_

Section B.

BEFORE CONTINUING WITH THE SURVEY, please check the following tables that compare two points in time (81 days of difference), worldwide and in Chile:

| GLOBAL             | CASES       | FATALITIES  |
|--------------------|-------------|-------------|
| April 17           | 2,167,398   | 149,378     |
| July 7             | 11,600,000  | 538,000     |
| <b>Growth rate</b> | <b>435%</b> | <b>260%</b> |

| CHILE | CASES | FATALITIES | AVAILABLE VENTILATORS | PEOPLE IN INTENSIVE CARE |
|-------|-------|------------|-----------------------|--------------------------|
|-------|-------|------------|-----------------------|--------------------------|

|                    |               |               |             |             |
|--------------------|---------------|---------------|-------------|-------------|
| April 17           | 9,252         | 116           | 579         | 387         |
| July 7             | 303,083       | 6,573         | 364         | 2,053       |
| <b>Growth rate</b> | <b>3,176%</b> | <b>5,566%</b> | <b>-37%</b> | <b>430%</b> |

Source: Ministry of Health of Chile

Contingent market  
**Important: READ ALL**

As the pandemic affects us, I would like to put you in the following situation that impacts the health and lives of people, especially the elderly or those with chronic diseases (cancer, hypertension, diabetes, autoimmune, among others).

In the case of Latin America, especially Chile, the number of infections and deaths is expected to rise in the coming weeks since winter leads to greater survival of the SARS-CoV-2 virus, as well as the circulation of other viruses (syncytial, influenza, and adenovirus, among others).

A state of catastrophe was declared due to the pandemic. This has allowed for enforcing preventive and mandatory quarantine, sanitary cordons in high-risk cities, and the suspension of productive, commercial, and educational activities, among others.

Further, this enabled the State of Chile to implement a series of economic support measures and incentives to help the population.

Regardless of state subsidies, the pandemic has caused a slowdown in economic activity, unemployment, violence, and sometimes family conflicts, among others.

As you know, several laboratories are working to find a vaccine to prevent infection or cure all of us from COVID-19.

Therefore, CONSIDERING THE INFORMATION PROVIDED, AS WELL AS YOUR INCOME AND PURCHASING POWER REDUCTION BASED ON YOUR EXPENSES AND DEBTS, please answer the following questions.

4. Given all the information provided, would you be willing to pay for a vaccine to protect yourself or your family against COVID-19 today? \*

1.8 Mark only one oval.

- Yes  
 No Skip to question 10

IDB

5. Would you be willing to pay \$135,431 (Chilean pesos) for a vaccine that immunizes or protects you against COVID-19, in addition to what your health insurance can give you?

1.9 Mark only one oval.

- Yes Skip to question 8  
 No

IDB 1

6. Would you be willing to pay \$67,716 (Chilean pesos) for a vaccine that immunizes or protects you against COVID-19, in addition to what your health insurance can give you?

1.10 Mark only one oval.

- Yes Skip to question 9  
 No Skip to question 9

IDB 2

7. Would you be willing to pay \$203,147 (Chilean pesos) for a vaccine that immunizes or protects you against COVID-19, in addition to what your health insurance can give you?

1.11 Mark only one oval.

- Yes  
 No

DPA

8. Regardless of the values mentioned above, what is the maximum you would be willing to pay (in Chilean pesos) for a vaccine that immunizes or protects you against COVID-19, in addition to what your health insurance can give you? \*

---

Skip to question 11

Negative answers

9. For what reasons are you unwilling to pay for the COVID-19 vaccine? (select a maximum of 3 options)

Check all that apply.

- I do not want to pay; it is immoral to pay.

- I do not have enough money for the COVID-19 vaccine.
- The government should pay for everyone to have the vaccine.
- Protecting myself from COVID-19 with vaccines is not important.
- I do not think others are willing to pay for a COVID-19 vaccine, so why should I pay for it?
- Society has bigger problems than COVID-19.
- The benefits of avoiding the disease are not enough to pay for the vaccine;  those who cause the virus must pay.
- The vaccine does not solve anything.

**Personal context characteristics**

**10.** What health insurance do you have? \*

**1.12** Mark only one oval.

- Fonasa (National Health Fund) Group A
- Fonasa Group B
- Fonasa Group C
- Fonasa Group D
- Isapre (Private Health Insurance Companies)
- Dipreca (Carabineros' Social Security Directorate) or Capredena (National Defense Social Security Fund) None
- Other: \_\_\_\_\_

**11.** What is your current employment status? \*

**1.13** Mark only one oval.

- Employee working in the company office (away from home)
- Partially teleworking employee
- Fully teleworking employee
- Unemployed due to the pandemic
- Unemployed since before the pandemic
- Retired, completely withdrawn from the job market
- Retired but working to supplement income
- Other: \_\_\_\_\_

**12. What is your gender? \***

1.14 Mark only one oval.

- Female Male
- Prefer not to say
- Other: \_\_\_\_\_

**13. How old are you? \***

---

14. What is your highest level of formal education? \*

1.15 Mark only one oval.

- Primary Secondary
- Technical (Training Center (CFT) or Technical and Vocational Training Institute (ITP))
- University Postgraduate

**15. Including you, how many people live in your household? \***

---

16. How many people over the age of 60 live in your household? \*

---

17. What is your family's total gross income range? \*

1.16 Mark only one oval.

- Greater than or equal to \$1,673,000
- From \$1,129,500 to \$1,672,000
- From \$730,000 to \$1,129,499
- From \$443,000 to \$729,000
- Less than \$443,000

**18. Due to the pandemic, my liquid INCOME has DROPPED by a percentage close to: \***

1.17 Mark only one oval.

- 100%
- 80-99%
- 60-79%

- 40-59%
- 20-39%
- 1-19%
- 0%

**19. I live in the commune of \***

---

**We appreciate your participation!**

If SUBMIT has already been clicked and if deemed pertinent, please send the link to your acquaintances to increase the response rate.
