# Supplementary material
Source: PubMed Central journal article supplement (PMC7899739)
Supplement: 40258_2021_644_MOESM2_ESM.pdf [file 40258_2021_644_MOESM2_ESM.pdf]

## Supplementary Material 2

# Willingness to Pay for a COVID-19 Vaccine

## *Applied Health Economics and Health Policy*

*Arcadio A. Cerda & Leidy Y. García*

Faculty of Economics and Business, University of Talca, Chile

E-mail address of the corresponding author: lgarcia@utalca.cl

**Table S1.** Payment vector, sample distribution and number of response frequency

| Initial bid<br>(USD)                                  | Lower bid<br>(USD) | Upper Bid<br>(USD) | Sample<br>distribution<br>Log-Normal | Response frequency |            |            |           |
|-------------------------------------------------------|--------------------|--------------------|--------------------------------------|--------------------|------------|------------|-----------|
|                                                       |                    |                    |                                      | Yes-<br>Yes        | Yes-<br>No | No-<br>Yes | No-<br>No |
| 0.7                                                   | 0.3                | 1.0                | 10                                   | 8                  | 0          | 1          | 1         |
| 15                                                    | 7                  | 22                 | 31                                   | 22                 | 5          | 2          | 2         |
| 61                                                    | 30                 | 91                 | 51                                   | 28                 | 15         | 4          | 4         |
| 101                                                   | 50                 | 151                | 46                                   | 29                 | 5          | 7          | 5         |
| 139                                                   | 69                 | 208                | 46                                   | 28                 | 2          | 7          | 9         |
| 177                                                   | 89                 | 266                | 47                                   | 22                 | 9          | 6          | 10        |
| 217                                                   | 109                | 326                | 54                                   | 15                 | 14         | 3          | 22        |
| 263                                                   | 132                | 395                | 55                                   | 20                 | 5          | 6          | 24        |
| 321                                                   | 161                | 482                | 70                                   | 28                 | 17         | 5          | 20        |
| 410                                                   | 205                | 615                | 30                                   | 10                 | 10         | 4          | 6         |
| Total individuals WTP for a COVID-19 Vaccine          |                    |                    | 440 (83%)                            | 210                | 82         | 45         | 103       |
| Total individuals Refusing WTP for a COVID-19 Vaccine |                    |                    | 91 (17%)                             |                    |            |            |           |
| Total sample                                          |                    |                    | 531                                  |                    |            |            |           |

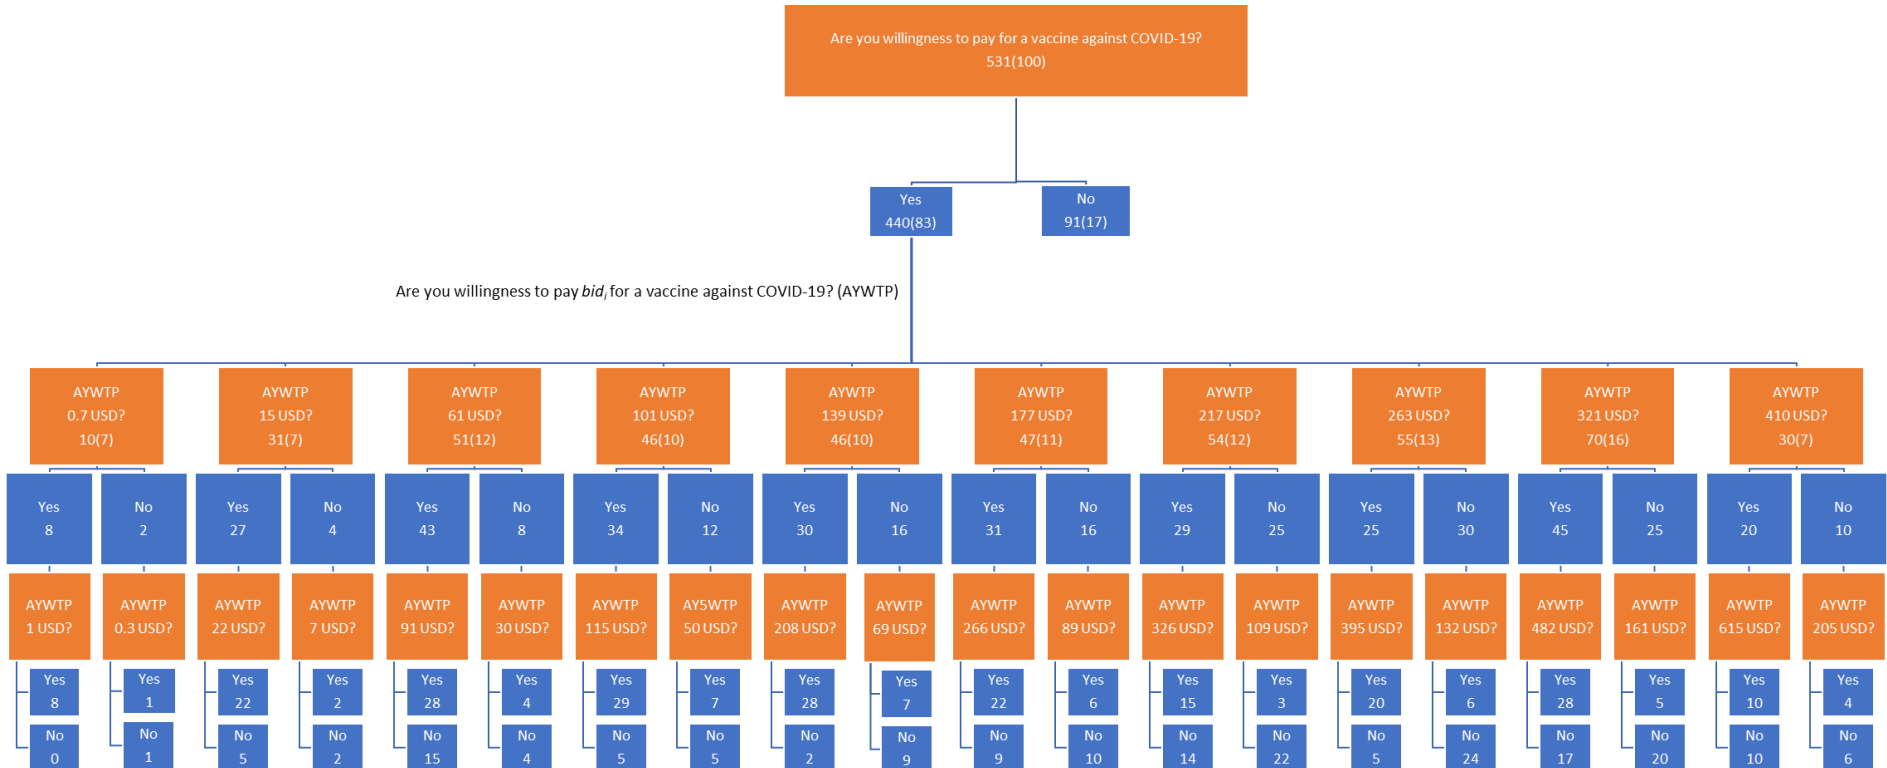

Note: AYWTP = Are you willingness to pay (*a given amount of dollars*) for a vaccine against COVID-19?. Number inside each box shows the number of respondents in each response and the number between parenthesis represents the percentage of respondents for each initial bid value offered.

**Table S2.** WTP estimates for different models.

| Variable                         | <b>MCO</b><br>Coefficient<br>(Standard Error) | <b>Interval Model</b><br>Coefficient<br>(Standard Error) | <b>Probit (DBDC)</b><br>Coefficient<br>(Standard Error) |
|----------------------------------|-----------------------------------------------|----------------------------------------------------------|---------------------------------------------------------|
| Constant                         | 129.180 <sup>a</sup><br>(19.948)              | 102.942 <sup>a</sup><br>(16.044)                         | 6.465<br>(13.102)                                       |
| Income                           | -5.269<br>(4.460)                             | -3.503<br>(3.727)                                        | 53.488 <sup>a</sup><br>(21.268)                         |
| Education                        | 24.567 <sup>a</sup><br>(7.439)                | 20.029 <sup>a</sup><br>(6.130)                           | 29.412 <sup>c</sup><br>(21.267)                         |
| Relative with COVID-19           | 17.941<br>(20.597)                            | 8.839<br>(17.062)                                        | 103.376 <sup>b</sup><br>(60.638)                        |
| Sigma                            |                                               | 80.583 <sup>a</sup><br>(3.800)                           | 278.83 <sup>a</sup><br>(19.426)                         |
| Sample                           | 440                                           | 440                                                      | 440                                                     |
| log-likelihood                   |                                               | -519.264                                                 | -559.285                                                |
| Wald Chi2(3)                     |                                               |                                                          | 35.42 <sup>a</sup>                                      |
| LR(3)                            |                                               | 11.86 <sup>a</sup>                                       |                                                         |
| R <sup>2</sup>                   | 0.026                                         | 0.011                                                    |                                                         |
| F(4,436)                         | 3.89 <sup>a</sup>                             |                                                          |                                                         |
|                                  | <b>WTP (\$)</b>                               |                                                          |                                                         |
| Mean WTP                         | 224.947 <sup>a</sup><br>(51.302)              | 145.443 <sup>a</sup><br>(5.516)                          | 231.924 <sup>a</sup><br>(16.497)                        |
| 95% Confidence interval WTP (\$) | 124 to 325                                    | 135 to 156                                               | 200 to 264                                              |

Note: <sup>a</sup> $p \leq 0.01$ , <sup>b</sup> $p \leq 0.05$ , <sup>c</sup> $p \leq 0.10$  \$=US Dollar.
